# Supplementary material
Source: PubMed Central journal article supplement (PMC4665792)
Supplement: JCI79070.sd.pdf [file JCI79070.sd.pdf]

Hitchcock Supplementary Figure 1

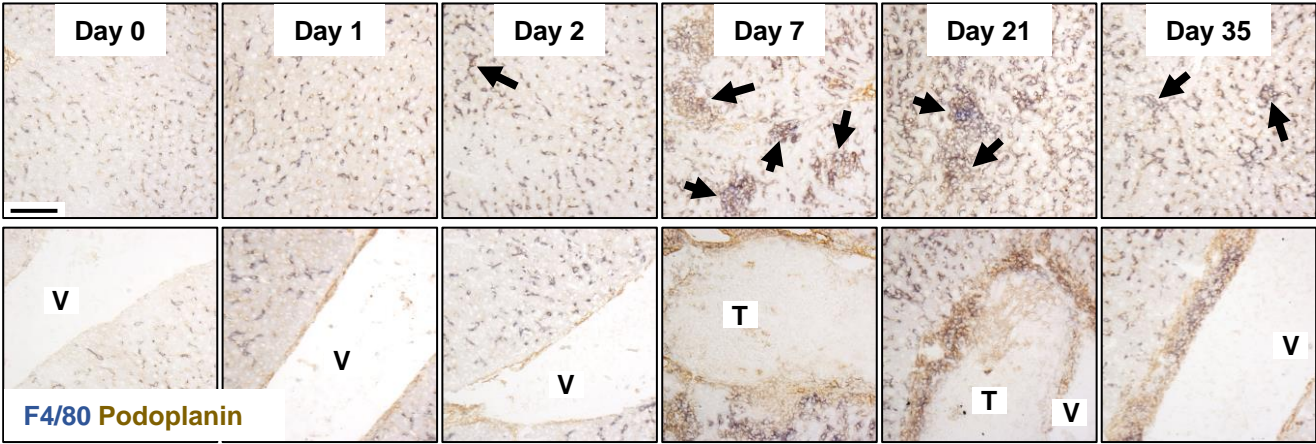

Hitchcock Supplementary Figure 2

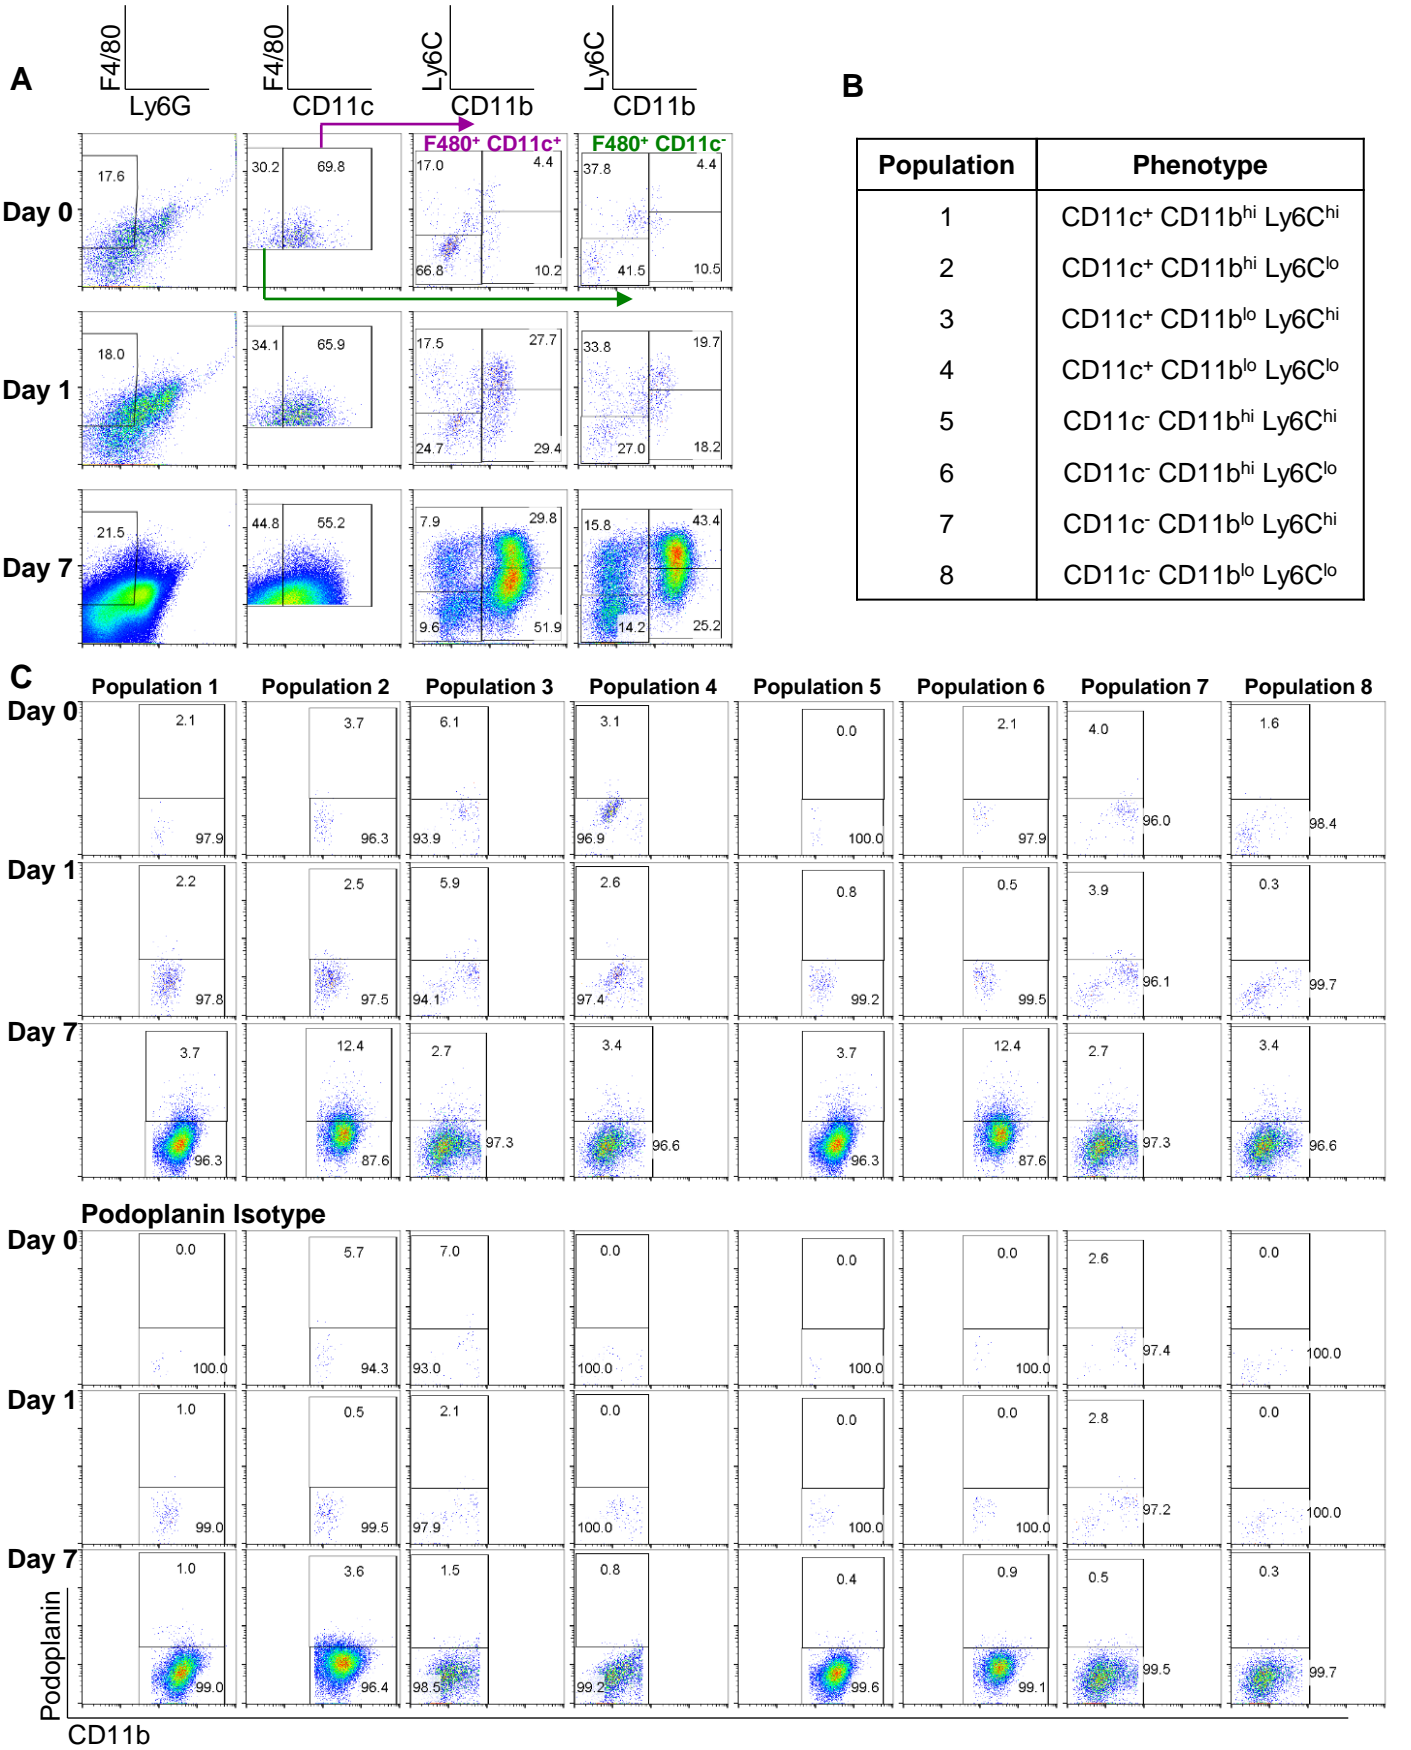

| Population | Phenotype                                                 |
|------------|-----------------------------------------------------------|
| 1          | CD11c <sup>+</sup> CD11b <sup>hi</sup> Ly6C <sup>hi</sup> |
| 2          | CD11c <sup>+</sup> CD11b <sup>hi</sup> Ly6C <sup>lo</sup> |
| 3          | CD11c <sup>+</sup> CD11b <sup>lo</sup> Ly6C <sup>hi</sup> |
| 4          | CD11c <sup>+</sup> CD11b <sup>lo</sup> Ly6C <sup>lo</sup> |
| 5          | CD11c <sup>-</sup> CD11b <sup>hi</sup> Ly6C <sup>hi</sup> |
| 6          | CD11c <sup>-</sup> CD11b <sup>hi</sup> Ly6C <sup>lo</sup> |
| 7          | CD11c <sup>-</sup> CD11b <sup>lo</sup> Ly6C <sup>hi</sup> |
| 8          | CD11c <sup>-</sup> CD11b <sup>lo</sup> Ly6C <sup>lo</sup> |

Population 1

Population 2

Population 3

Population 4

Population 5

Population 6

Population 7

Population 8

Day 0

2.1

3.7

6.1

3.1

0.0

2.1

4.0

1.6

97.9

96.3

93.9

96.9

100.0

97.9

96.0

98.4

Day 1

2.2

2.5

5.9

2.6

0.8

0.5

3.9

0.3

97.8

97.5

94.1

97.4

99.2

99.5

96.1

99.7

Day 7

3.7

12.4

2.7

3.4

3.7

12.4

2.7

3.4

96.3

87.6

97.3

96.6

96.3

87.6

97.3

96.6

Podoplanin Isotype

Day 0

0.0

5.7

7.0

0.0

0.0

0.0

2.6

0.0

100.0

94.3

93.0

100.0

100.0

100.0

97.4

100.0

Day 1

1.0

0.5

2.1

0.0

0.0

0.0

2.8

0.0

99.0

99.5

97.9

100.0

100.0

100.0

97.2

100.0

Day 7

1.0

3.6

1.5

0.8

0.4

0.9

0.5

0.3

99.0

96.4

98.5

99.2

99.6

99.1

99.5

99.7

CD11b

Hitchcock Supplementary Figure 3

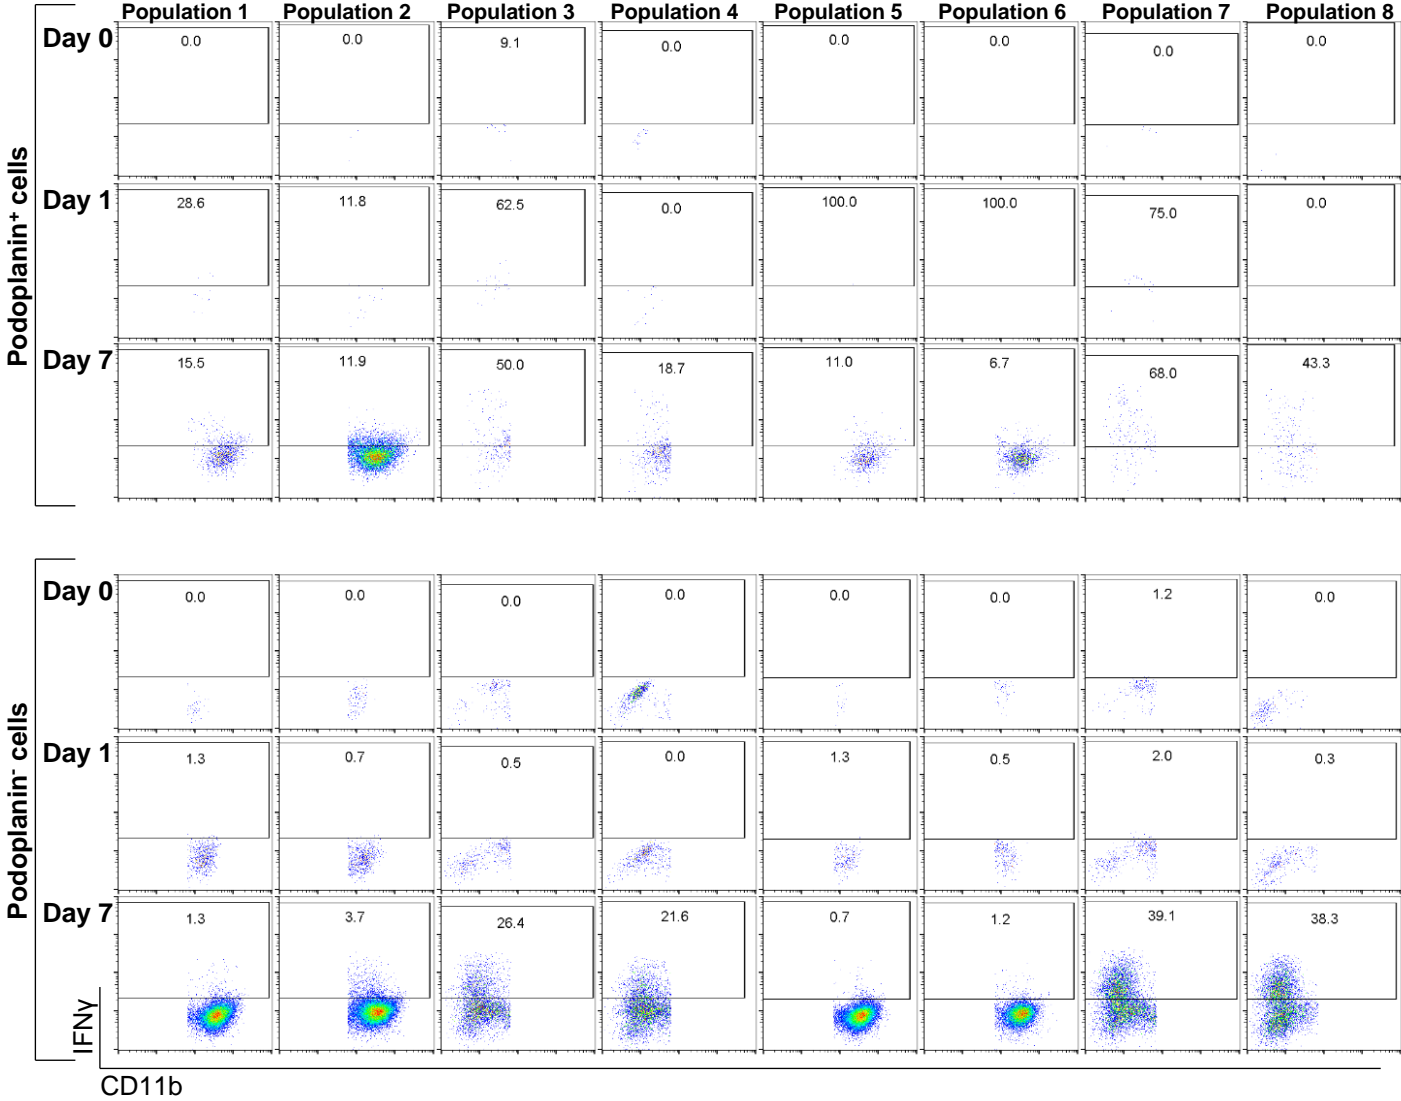

Hitchcock Supplementary Figure 4

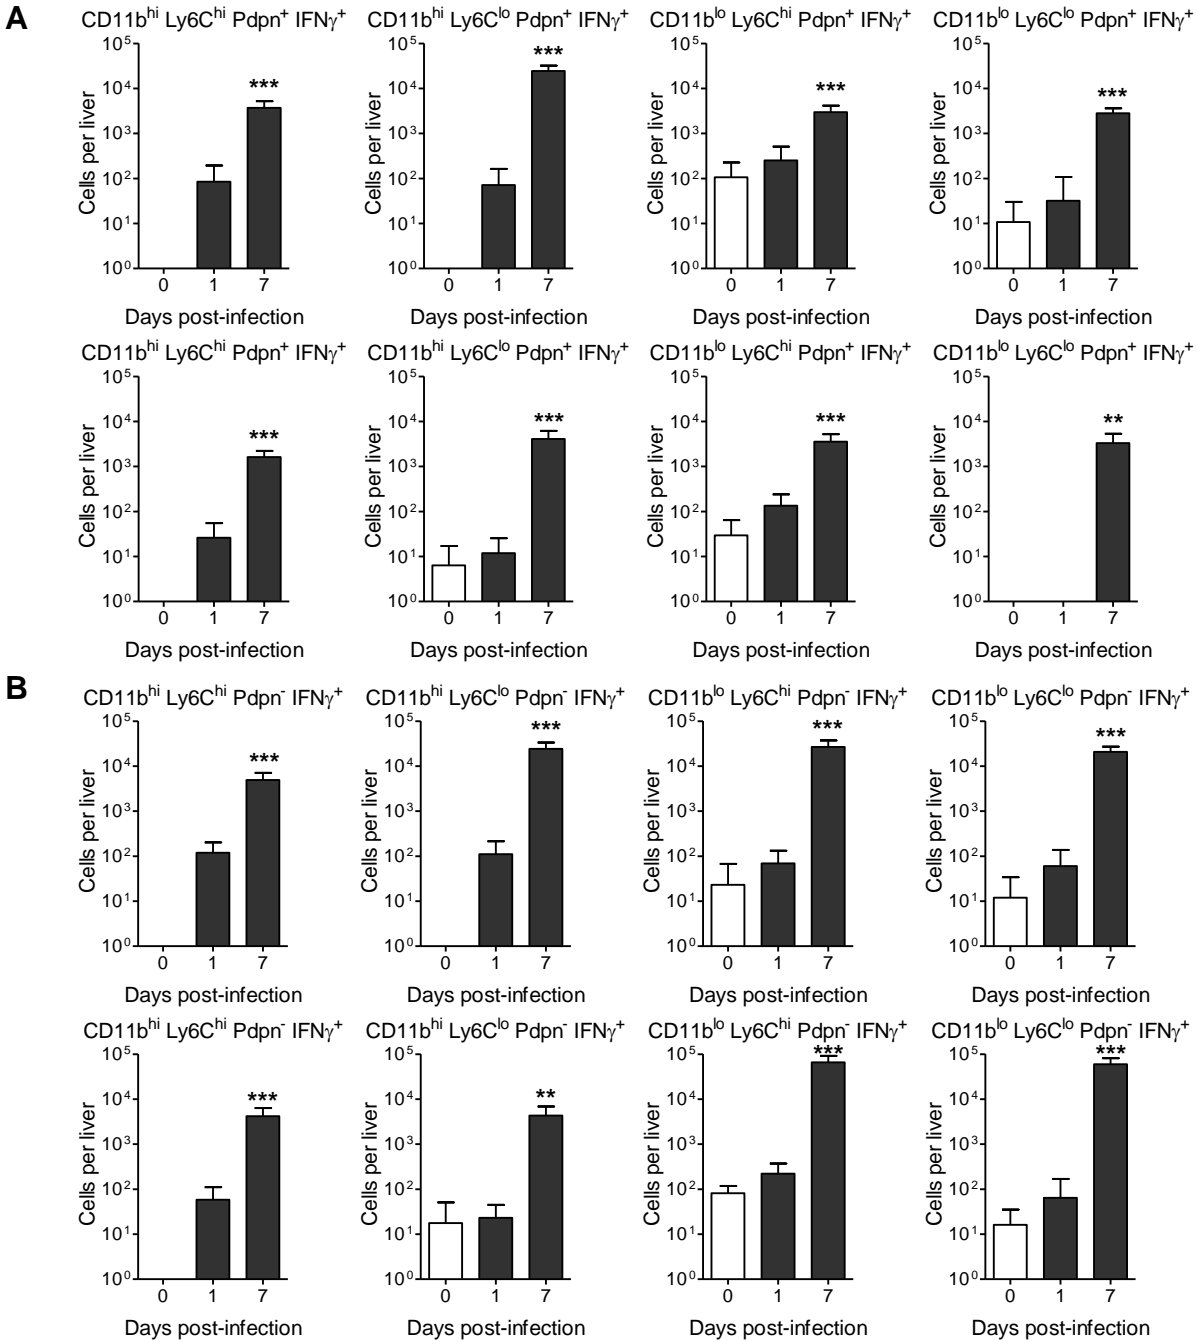

Hitchcock Supplementary Figure 5

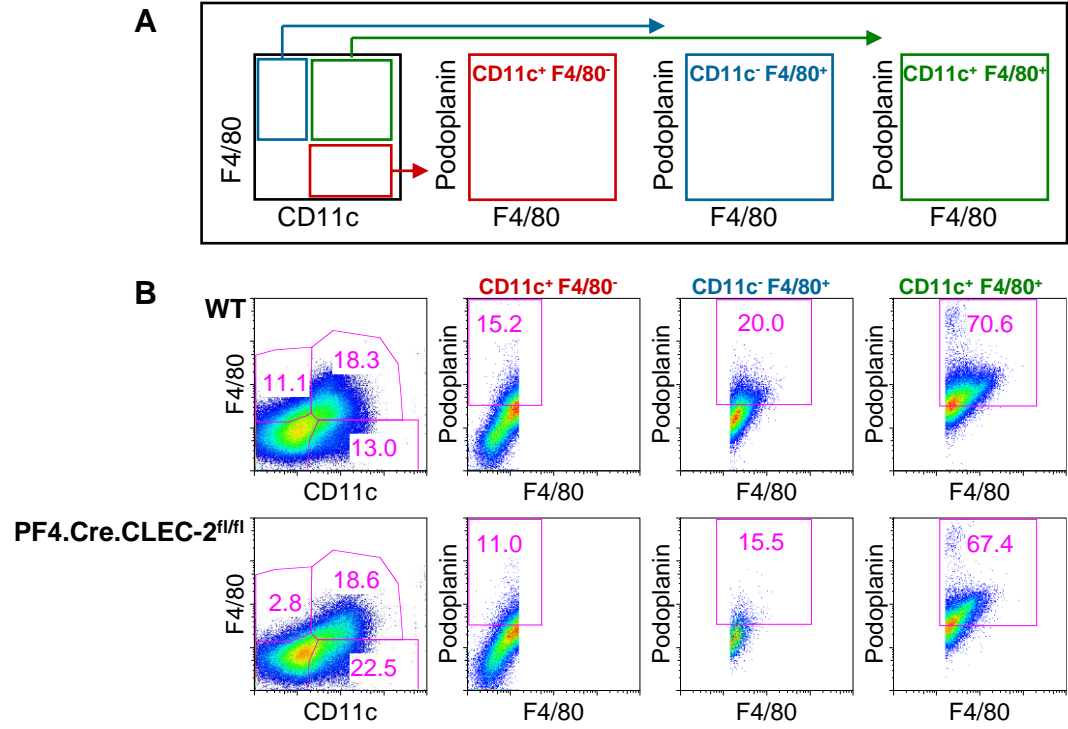

Hitchcock Supplementary Figure 6

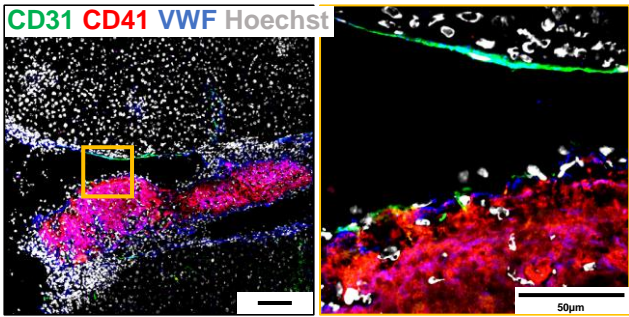

## **Supplemental Figure Legends**

### **Supplementary Figure 1. Podoplanin is expressed by macrophages throughout infection**

WT mice were infected i.p. with  $5 \times 10^5$  CFU STm and podoplanin expression was examined during infection in parenchymal (top panel) and vascular (bottom panel) regions by IHC on frozen liver sections using podoplanin (brown), F4/80 (blue). Images are representative of 3 experiments where  $n \geq 4$  mice in each group. Scale bars represent 100  $\mu\text{m}$ ; arrows = inflammatory foci; V = blood vessel, T = thrombus.

### **Supplementary Figure 2. Podoplanin is expressed by multiple macrophage populations during infection**

WT mice were infected i.p. as above. Leukocytes were isolated from livers and podoplanin expression by macrophage populations was measured by flow cytometry. A) Representative FACS plots:  $\text{F4/80}^+ \text{Ly6G}^{\text{lo}}$  cells were subdivided by expression of CD11c, then further characterised into 8 populations according to expression of CD11b and Ly6C (listed in B). C) Representative FACS plots of podoplanin expression in each population (top panel) and isotype control (bottom panel). All FACS plots are from a representative experiment, (one of 4 repeat experiments), with each group containing  $\geq 4$  mice.

### **Supplementary Figure 3. $\text{IFN}\gamma$ is produced by macrophage populations in the liver during infection**

EYFP  $\text{IFN}\gamma$  reporter mice were infected as above for 7 days and  $\text{IFN}\gamma$  production was examined by flow cytometry in leukocytes isolated from the liver. Macrophage populations were classified according to the gating strategy outlined in Figure 7;  $\text{IFN}\gamma$ -producing cells were identified by EYFP expression. Representative FACS plots are shown from experiments

performed twice with  $\geq 4$  mice per group at each time-point. Absolute numbers of cells are shown in Supplementary Figure 4.

#### **Supplementary Figure 4. IFN $\gamma$ is produced by macrophage populations in the liver during infection**

EYFP IFN $\gamma$  reporter mice were infected as above for 7 days and IFN $\gamma$  production was examined by flow cytometry in leukocytes isolated from the liver, according to the gating strategy defined in Figure 8. Representative FACS plots are shown in Supplementary Figure 3. Absolute numbers of EYFP $^{+}$  cells from A) podoplanin $^{+}$  and B) podoplanin $^{-}$  subsets of populations 1-8 (top panel: CD11c $^{+}$  populations; bottom panel: CD11c $^{-}$  populations). Data are representative of experiments performed twice with  $\geq 4$  mice per group per time-point. Statistical significance (One-way ANOVA with Dunnett's test) was determined relative to NI mice \*\* =  $p \leq 0.01$ , \*\*\* =  $p \leq 0.001$ .

#### **Supplementary Figure 5. Absence of CLEC-2 on platelets does not affect podoplanin expression**

WT and PF4.Cre.CLEC-2 $^{fl/fl}$  mice were infected as above for 7 days. Podoplanin expression was measured by flow cytometry on leukocytes isolated from the liver. A) The gating strategy used to broadly define podoplanin-expressing populations. B) Representative FACS plots of podoplanin expression by CD11c $^{+}$  F4/80 $^{-}$  (red), CD11c $^{-}$  F4/80 $^{+}$  (blue) and CD11c $^{+}$  F4/80 $^{+}$  (green) populations. Data are representative of 4 repeat experiments, with each group containing  $\geq 4$  mice.

#### **Supplementary Figure 6. Von Willebrand Factor co-localises with CD41 $^{+}$ platelet thrombi**

WT mice were infected as above for 7 days and frozen liver sections were examined by confocal fluorescence microscopy; CD31 (green), CD41 (red), von Willebrand factor (VWF)

48 (blue), Hoechst (grey); right panel = higher magnification of boxed region. Images are  
49 representative of a minimum of 3 experiments, where  $n \geq 4$  mice per group. Scale bars  
50 represent 100 $\mu$ m unless otherwise stated.

51

52
